# Supplementary material
Source: PubMed Central journal article supplement (PMC3043662)

## Supplementary Material

### Legends for Supplementary Figures:

#### **Figure S1: Oxidative stress and disrupted energy metabolism in Ppt1-KO mice and INCL cells**

(A) Western blot analysis of SOD2 protein levels from the cerebral cortex of 1-, 3- and 6-month old WT mice and their *Ppt1*-KO littermates. (B) Western blot analysis of p-AMPK and PGC-1 $\alpha$  protein levels in the INCL patient fibroblast with AICAR treatment for various time periods.  $\beta$ -Actin was used as loading control. (C) Western blot analysis of FoxO3a protein levels from the cerebral cortex of 1-, 3- and 6-month old WT mice and their *Ppt1*-KO littermates. (D) Western blot analysis of FoxO3a protein levels in the brain tissue lysates of WT mice and their *Ppt1*-KO littermates on normal diet, or on RSV diet.

#### **Figure S2: Resveratrol stimulates mRNA levels of transcription factors regulating mitochondrial biogenesis.**

(A) A comparison of Mfn1-, Fis1- and TFAM-mRNA levels in untreated normal and INCL fibroblasts determined by real-time RT-PCR. (B) Levels of Mfn1-, Fis1- and TFAM-mRNAs in untreated and RSV (20 $\mu$ M)-treated cultured INCL fibroblasts. Note that RSV treatment increases mRNA levels of all 3 transcription factors in a time-dependent manner. (C) Stimulation of Mfn1-, Fis1- and TFAM-mRNA levels in brain tissues of WT mice and *Ppt1*-KO littermates by normal and RSV-diets. Results are expressed as the mean  $\pm$  SEM. (n=3). Asterisks indicate levels of significance (\*, p<0.05; \*\*, p<0.01).

**Figure S3: Resveratrol down-regulates PI3- and Akt-kinases in *Ppt1*-KO mouse brain.**

(A) Western blot analysis of PI3K in cerebral cortex of 1-, 3- and 6-month-old WT mice and their *Ppt1*-KO littermates. (B) Western blot analysis of p-Akt (Ser 473), p-AKT (Thr 308) and control Akt proteins in cerebral cortex of 1-, 3- and 6-month-old WT mice and their *Ppt1*-KO littermates. (C) Western blot analysis of p-Akt (Ser 473), p-Akt (Thr 308), control Akt proteins and PI3K in cerebral cortex of *Ppt1*-KO mice on normal- or RSV-diet.  $\beta$ -actin was used as loading control.

Supplementary Figure 1

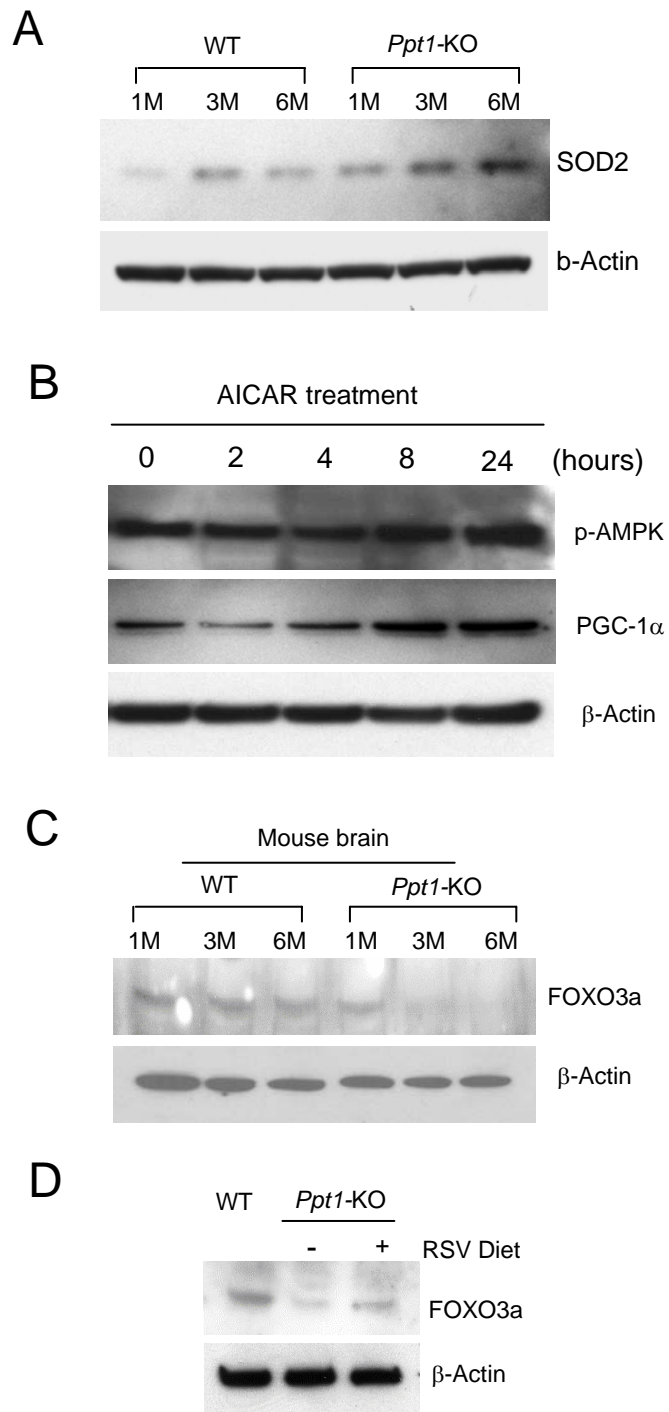

Supplementary Figure 2

A

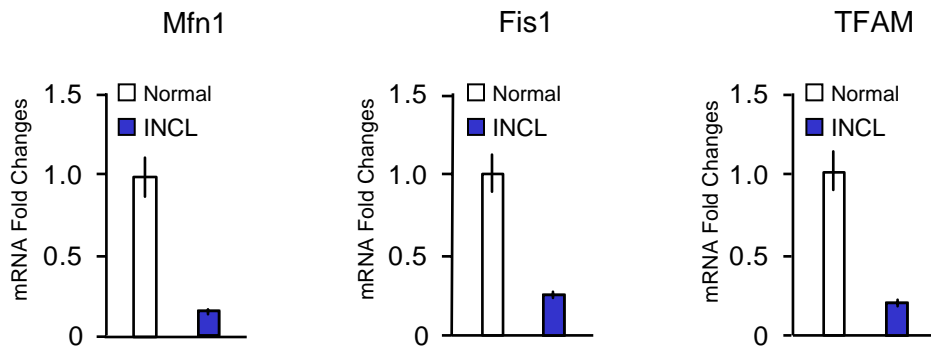

B

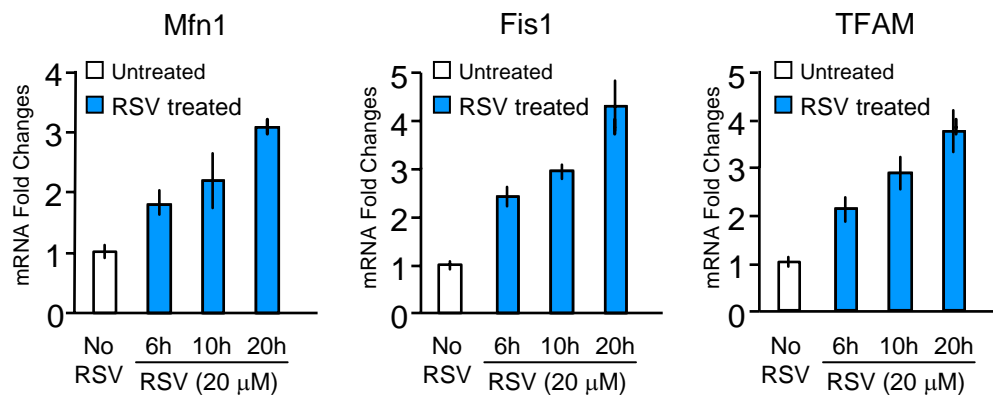

C

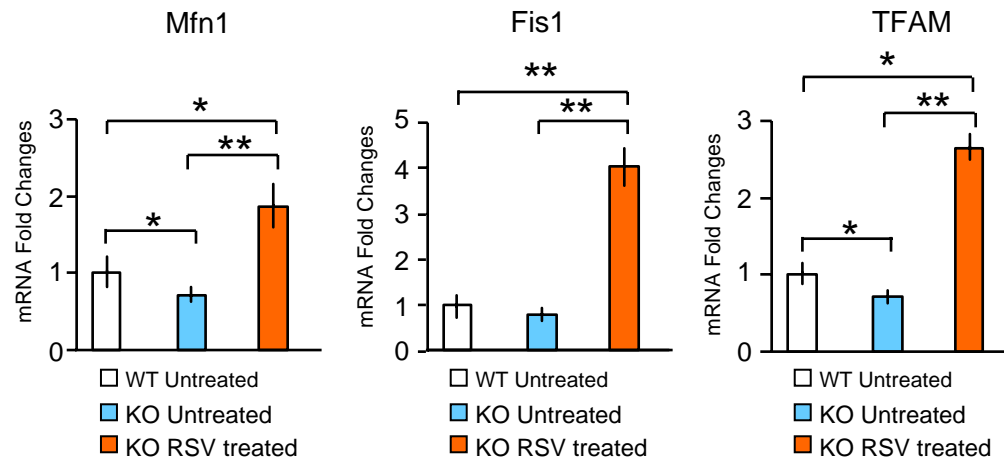

Supplementary Figure 3

A

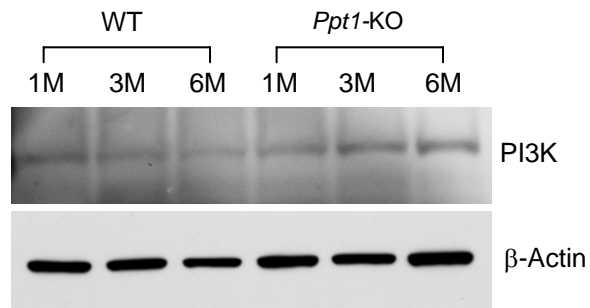

B

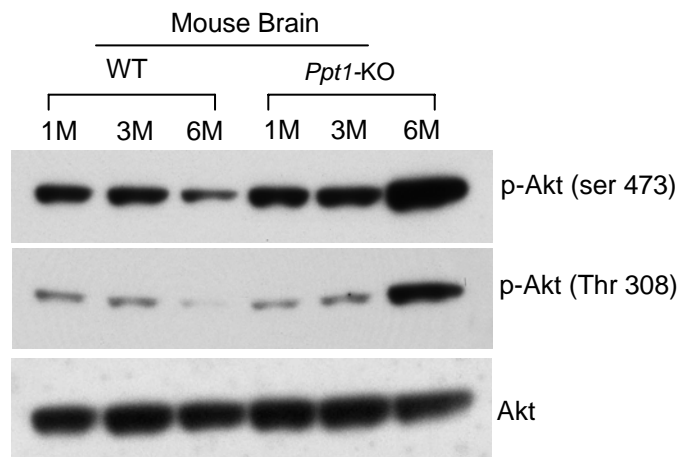

C

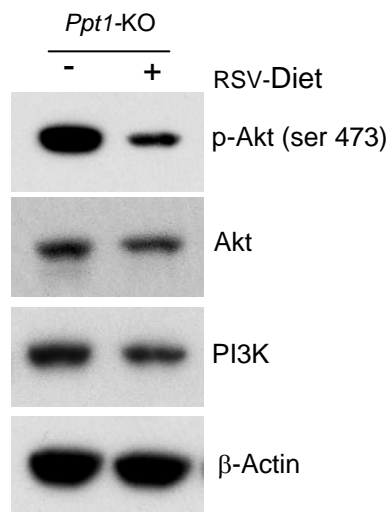

Supplement: supp_ddq555_ddq555supp.pdf [file supp_ddq555_ddq555supp.pdf]
